# Supplementary material for: Potential COVID-19 Drug Candidates Based on Diazinyl-Thiazol-Imine Moieties: Synthesis and Greener Pastures Biological Study
Source: MDPI journal article supplement (doi:10.3390/molecules27020488), 2022-01-13

Figure S1: IR of compound (**3a**)

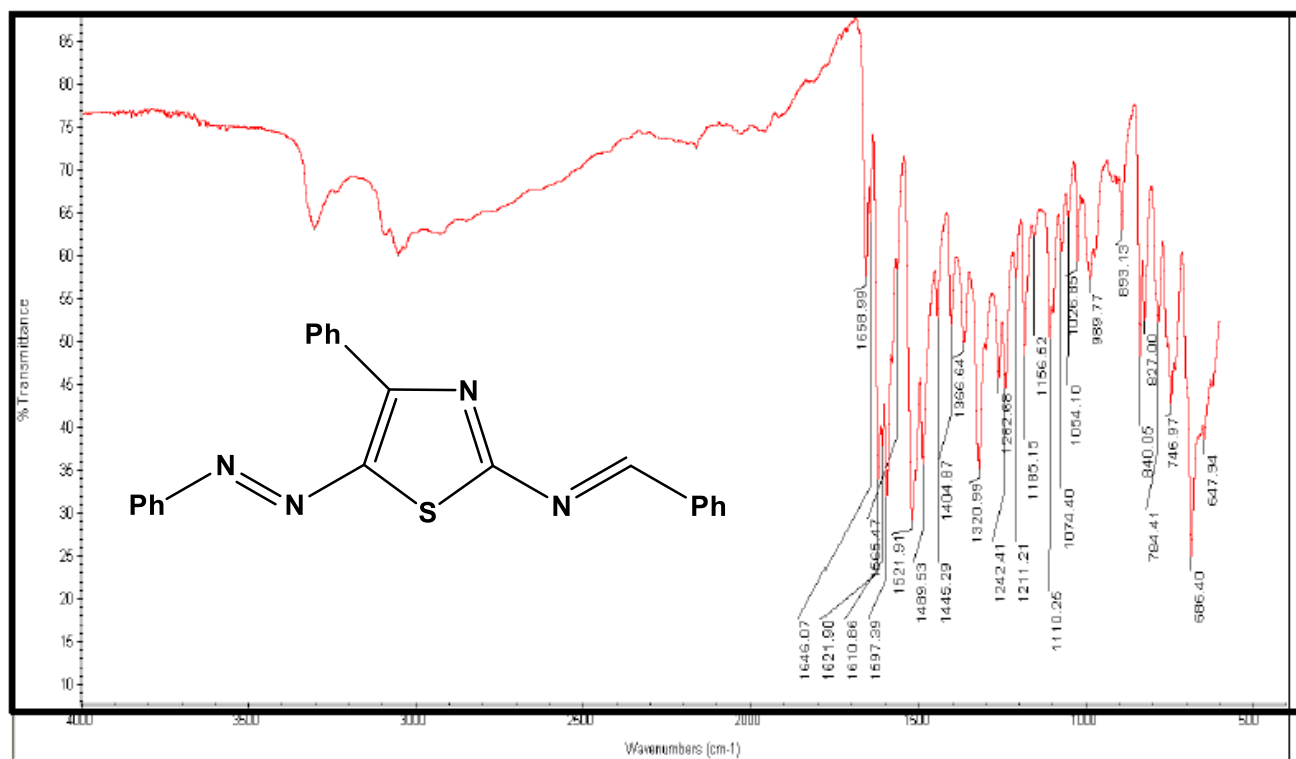

Figure S2: <sup>1</sup>H NMR of compound (**3a**)

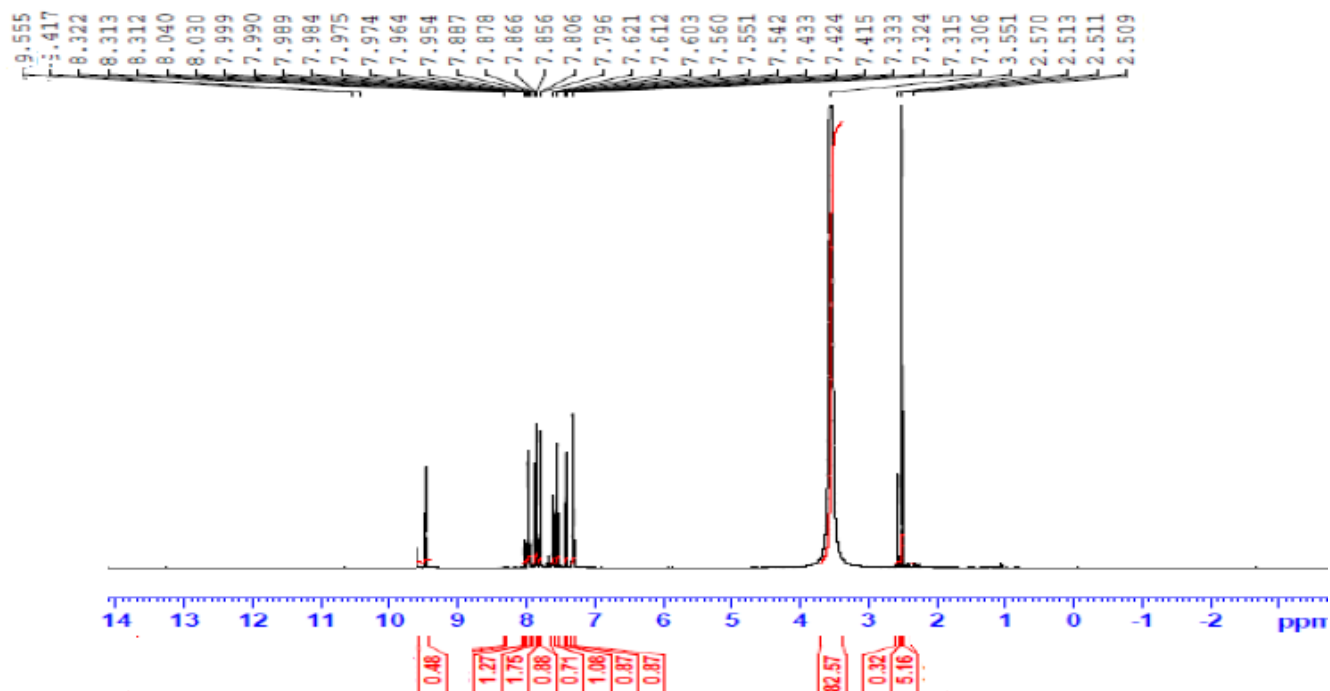

Figure S3:  $^{13}\text{C}$  NMR of compound (**3a**)

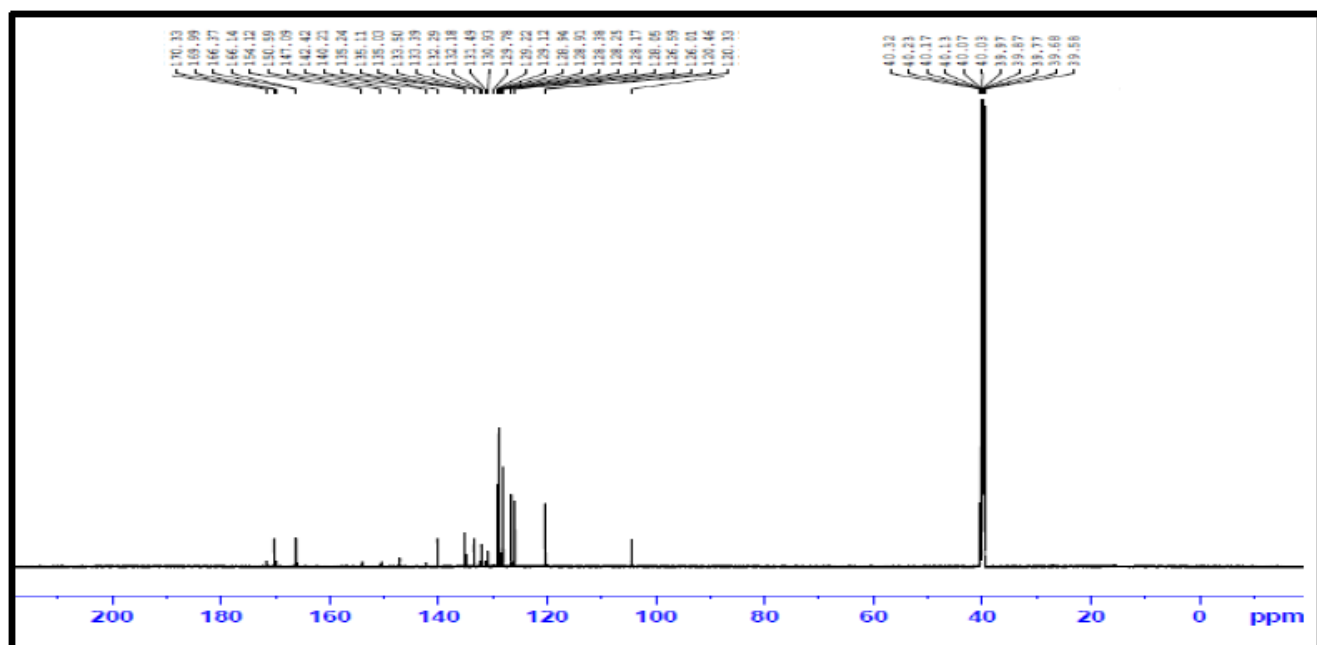

Figure S4: MS of compound (**3a**)

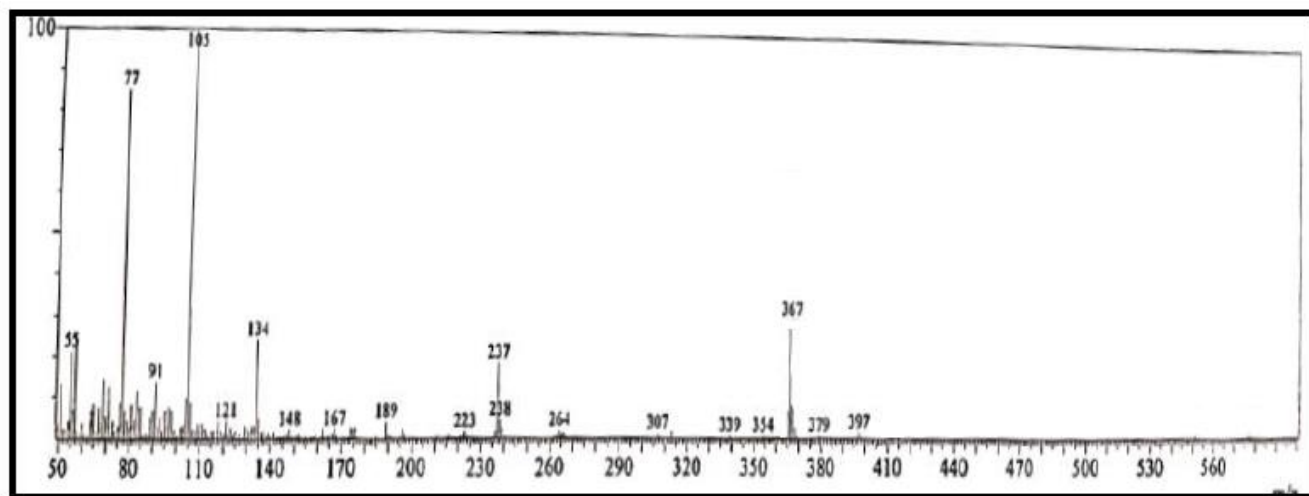

Figure S5: IR of compound (**3e**)

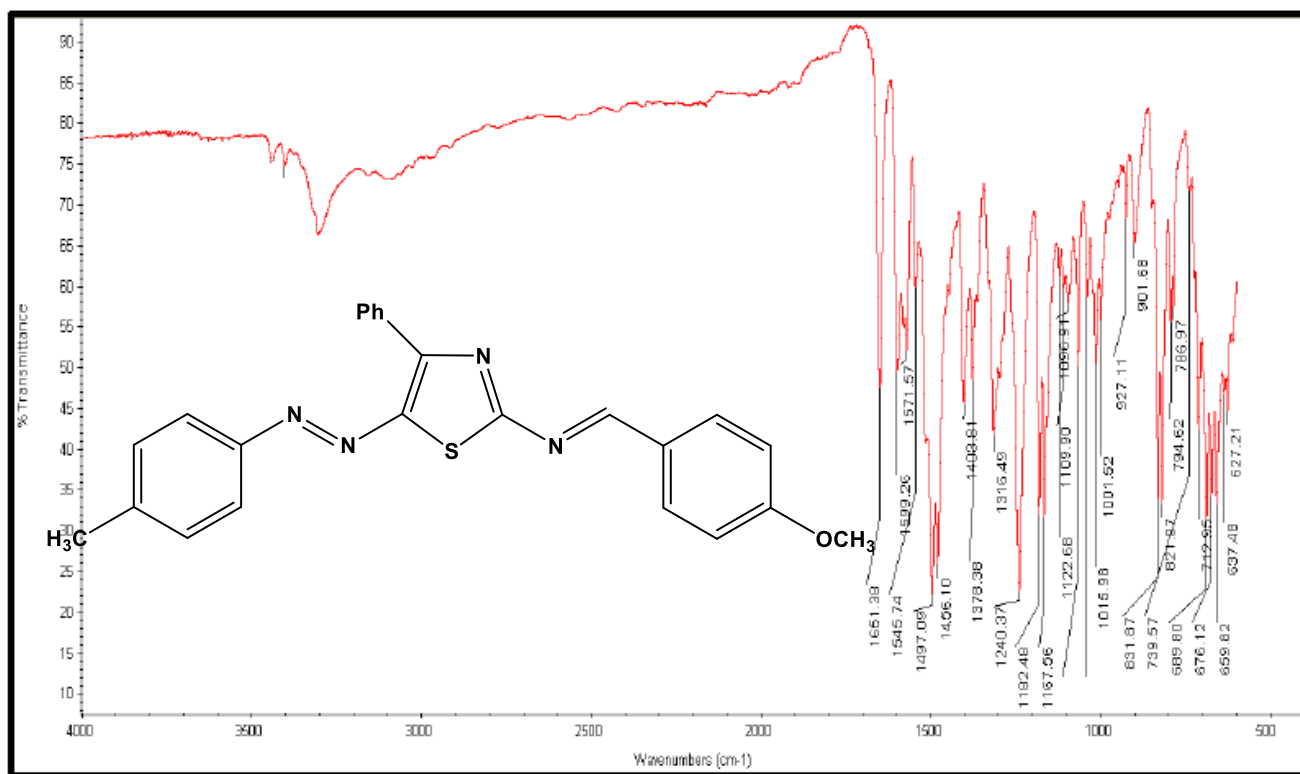

Figure S6: <sup>1</sup>H NMR of compound (**3e**)

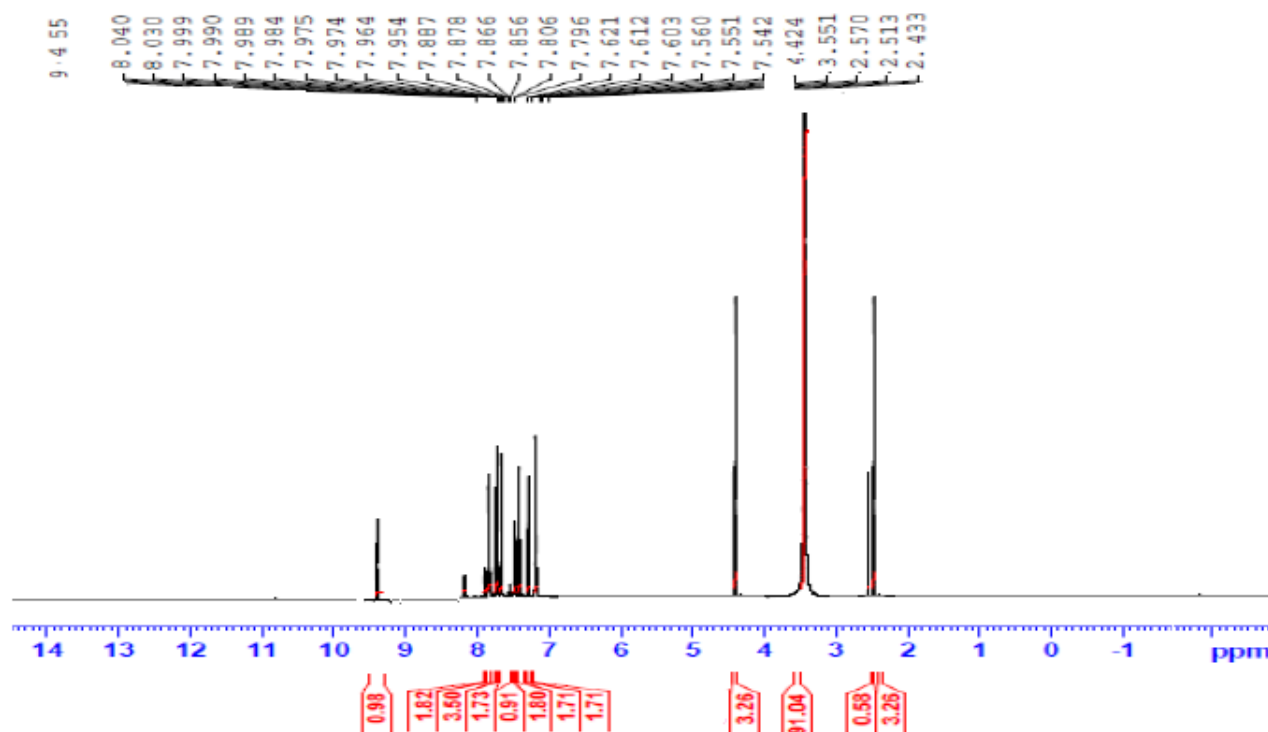

Figure S7:  $^{13}\text{C}$  NMR of compound (**3e**)

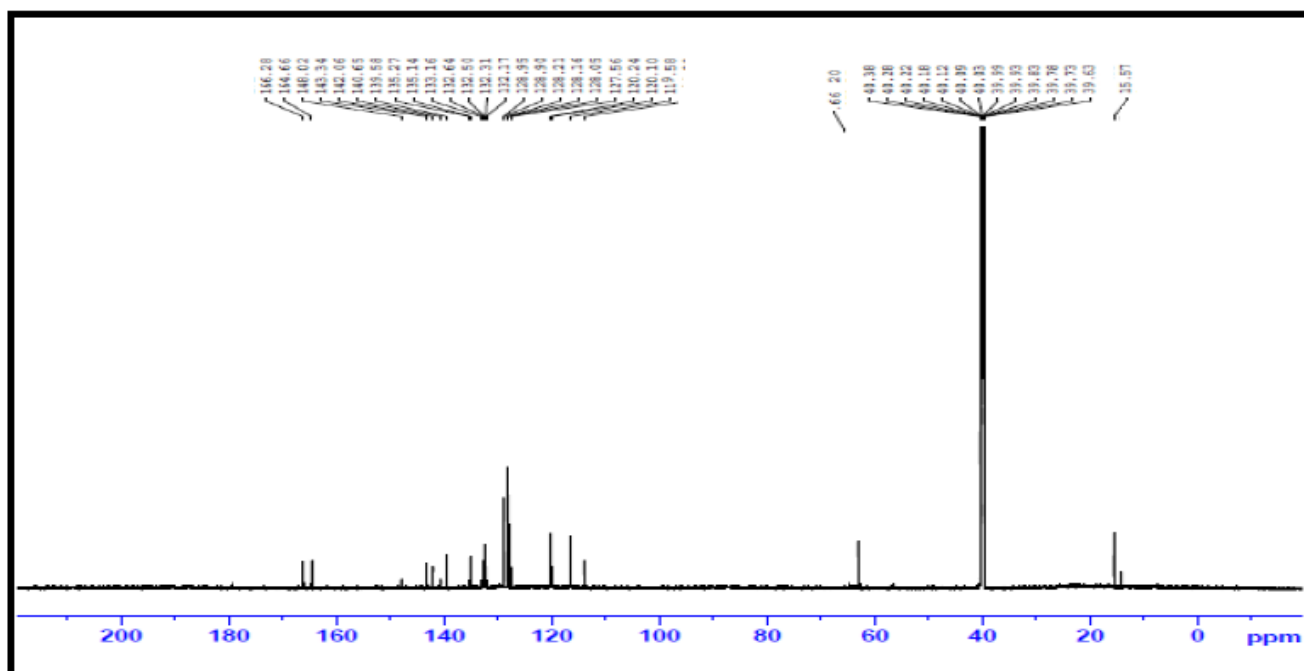

Figure S8: MS of compound (**3e**)

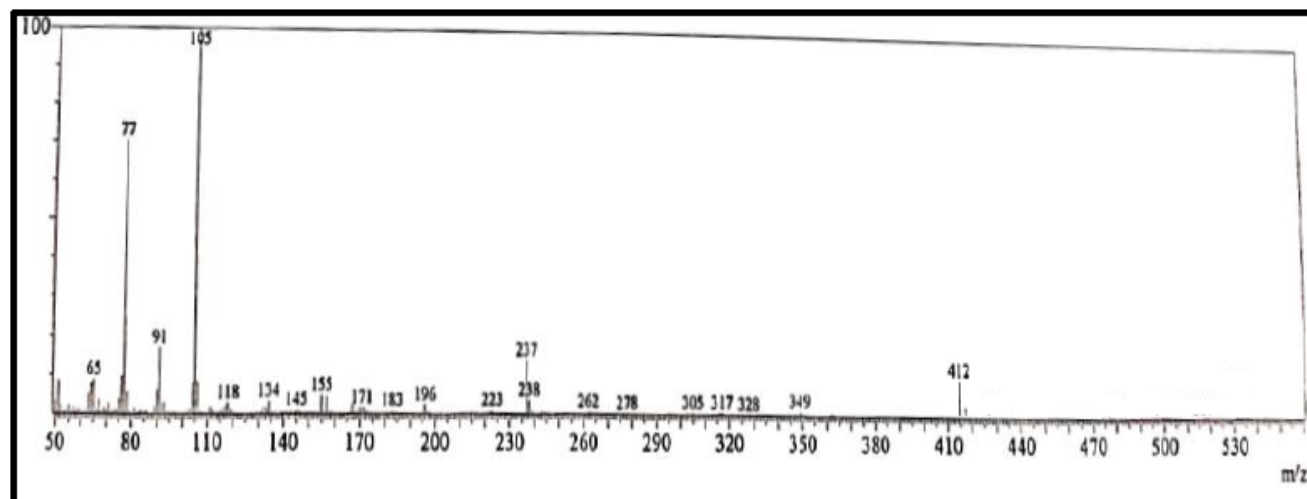

Supplement: s1 [file s1]
